# Supplementary material for: Postnatal dexamethasone, respiratory and neurodevelopmental outcomes at two years in babies born extremely preterm
Source: PubMed Central journal article supplement (PMC5517008; doi:10.1371/journal.pone.0181176), 2017-07-19
Supplement: pone.0181176.s001.pdf [file pone.0181176.s001.pdf]

## Supporting information (S1)

### Postnatal Dexamethasone, respiratory and neurodevelopmental outcomes at two years in babies born extremely preterm

Gordon Qin, Jessica W Lo, Neil Marlow, Sandy A Calvert, Anne Greenough, Janet L Peacock

| Page | Item                                                                                                                                                                 |
|------|----------------------------------------------------------------------------------------------------------------------------------------------------------------------|
| 2    | Table A Respiratory hospital admissions and dexamethasone exposure expressed as odds ratios (see table 2 in main text for equivalent analyses as proportions)        |
| 3    | Table B. Any neurodevelopmental impairment and postnatal steroid exposure expressed as odds ratios (see table 3 in main text for equivalent analyses as proportions) |
| 4    | Table C. Sensitivity analysis of the multivariable regression model using oxygen dependency at 28 days instead of oxygen dependency at 36 weeks PMA                  |
| 5    | Further information on propensity score matching                                                                                                                     |

**Table A Respiratory hospital admissions and dexamethasone exposure expressed as odds ratios (see table 2 for equivalent analyses as proportions)**

| <b>Respiratory hospital admission n=88, 21%</b> |                              |                              |
|-------------------------------------------------|------------------------------|------------------------------|
|                                                 | <b>Unadjusted</b>            | <b>Adjusted<sup>1</sup></b>  |
|                                                 | <b>Odds ratio (95% CI)</b>   | <b>Odds ratio (95% CI)</b>   |
|                                                 | <b>p-value</b>               | <b>p-value</b>               |
| <b>Dexamethasone exposure</b>                   |                              |                              |
| <b>No</b>                                       | 1.00                         | 1.00                         |
| <b>Yes</b>                                      | 3.07 (1.88 – 5.00)<br><0.001 | 3.14 (1.69 – 5.84)<br><0.001 |
| <b>Timing of dexamethasone</b>                  | Overall p-value:<br><0.001   | Overall p-value:<br><0.001   |
| <b>None</b>                                     | 1.00                         | 1.00                         |
| <b>Early</b>                                    | 4.39 (1.14 – 17.0)<br>0.032  | 5.56 (1.21 – 25.6)<br>0.027  |
| <b>Late</b>                                     | 2.97 (1.80 – 4.92)<br><0.001 | 2.96 (1.56 – 5.59)<br>0.027  |
| <b>No. of courses</b>                           | Overall p-value:<br><0.001   | Overall p-value:<br>0.001    |
| <b>0 course</b>                                 | 1.00                         | 1.00                         |
| <b>1 course</b>                                 | 2.85 (1.61 – 5.05)           | 2.90 (1.47 – 5.73)           |
| <b>2 courses</b>                                | 3.47(1.57 – 7.63)            | 3.66 (1.42 – 9.44)           |
| <b>3 courses</b>                                | 3.43 (1.07 – 11.0)           | 4.02 (1.07 – 15.1)           |
| <b>No. of days of exposure</b>                  | Overall p-value:<br><0.001   | Overall p-value:<br><0.001   |
| <b>0</b>                                        | 1.00                         | 1.00                         |
| <b>1-6</b>                                      | 1.44 (0.51 – 4.07)           | 1.60 (0.52 – 4.95)           |
| <b>7-12</b>                                     | 3.80 (1.92 – 7.50)           | 3.73 (1.69 – 8.23)           |
| <b>&gt;12</b>                                   | 3.54 (1.86 – 6.75)           | 3.66 (1.66 – 8.05)           |

**Footnotes:** 1. Adjusted for sex, birthweight z-score, gestational age in weeks, smoking in pregnancy, oxygen dependency at 36 weeks, airleak, patent ductus arteriosus, pulmonary haemorrhage, major neonatal ultrasound abnormality, ventilation group and age at 24 month assessment using multiple logistic regression analysis.

**Table B. Any neurodevelopmental impairment and postnatal steroid exposure expressed as odds ratios (see table 3 for equivalent analyses as proportions)**

| <b>Any neurodevelopmental impairment n=201, 49%</b> |                              |                              |
|-----------------------------------------------------|------------------------------|------------------------------|
|                                                     | <b>Unadjusted</b>            | <b>Adjusted <sup>1</sup></b> |
|                                                     | <b>Odds ratio (95% CI)</b>   | <b>Odds ratio (95% CI)</b>   |
|                                                     | <b>p-value</b>               | <b>p-value</b>               |
| <b>Dexamethasone exposure</b>                       |                              |                              |
| <b>No</b>                                           | 1.00                         | 1.00                         |
| <b>Yes</b>                                          | 2.20 (1.42 – 3.40)<br><0.001 | 1.88 (1.08 – 3.28)<br>0.026  |
| <b>Timing of dexamethasone</b>                      | Overall p-value:<br><0.001   | Overall p-value:<br>0.026    |
| <b>None</b>                                         | 1.00                         | 1.00                         |
| <b>Early</b>                                        | 1.65 (0.43 – 6.26)<br>0.46   | 1.66 (0.39 – 7.12)<br>0.49   |
| <b>Late</b>                                         | 2.25 (1.43 – 3.53)<br><0.001 | 1.91 (1.07 – 3.40)<br>0.028  |
| <b>No. of courses</b>                               | Overall p-value:<br>0.001    | Overall p-value:<br>0.074    |
| <b>0 course</b>                                     | 1.00                         | 1.00                         |
| <b>1 course</b>                                     | 2.14 (1.27 – 3.58)           | 1.93 (1.03 – 3.62)           |
| <b>2 courses</b>                                    | 2.09 (0.98 – 4.46)           | 1.81 (0.74 – 4.43)           |
| <b>3 courses</b>                                    | 2.96 (0.89 – 9.85)           | 1.72 (0.42 – 7.00)           |
| <b>No. of days of exposure</b>                      | Overall p-value:<br>0.002    | Overall p-value:<br>0.04     |
| <b>0</b>                                            | 1.00                         | 1.00                         |
| <b>1-6</b>                                          | 3.95 (1.52 – 10.2)           | 3.26 (1.14 – 9.30)           |
| <b>7-12</b>                                         | 1.32 (0.70 – 2.49)           | 0.99 (0.46 – 2.16)           |
| <b>&gt;12</b>                                       | 2.63 (1.41 – 4.93)           | 2.60 (1.20 – 5.57)           |

**Footnotes:** 1. Adjusted for sex, birthweight z-score, gestational age in weeks, maternal smoking in pregnancy, oxygen dependency at 36 weeks PMA, airleak, patent ductus arteriosus, pulmonary haemorrhage, major neonatal ultrasound abnormality, ventilation group and age at 24 month assessment using multiple logistic regression analysis.

**Table C. Sensitivity analysis of the multivariable regression model using oxygen dependency at 28 days instead of oxygen dependency at 36 weeks PMA**

|                                | <b>Outcome: Respiratory hospital admissions</b> | <b>Outcome: Any impairment</b> |
|--------------------------------|-------------------------------------------------|--------------------------------|
|                                | <b>Odds ratio (95% CI)</b>                      | <b>Odds ratio (95% CI)</b>     |
|                                | <b>p-value</b>                                  | <b>p-value</b>                 |
| <b>Dexamethasone exposure</b>  |                                                 |                                |
| <b>No</b>                      | 1.00                                            | 1.00                           |
| <b>Yes</b>                     | 3.19 (1.73 – 5.89)<br><0.001                    | 1.87 (1.08 – 3.25)<br>0.026    |
| <b>Timing of dexamethasone</b> | Overall p-value:<br><0.001                      | Overall p-value:<br>0.027      |
| <b>None</b>                    | 1.00                                            | 1.00                           |
| <b>Early</b>                   | 5.67 (1.24 – 26.0)<br>0.026                     | 1.67 (0.39 – 7.16)<br>0.49     |
| <b>Late</b>                    | 3.00 (1.60 – 5.64)<br>0.001                     | 1.89 (1.07 – 3.36)<br>0.028    |
| <b>No. of courses</b>          | Overall p-value:<br>0.001                       | Overall p-value:<br>0.071      |
| <b>0 course</b>                | 1.00                                            | 1.00                           |
| <b>1 course</b>                | 2.93 (1.49 – 5.76)                              | 1.91 (1.02 – 3.59)             |
| <b>2 courses</b>               | 3.73 (1.46 – 9.54)                              | 1.80 (0.74 – 4.39)             |
| <b>3 courses</b>               | 4.17 (1.12 – 15.5)                              | 1.75 (0.44 – 7.06)             |
| <b>No. of days of exposure</b> | Overall p-value:<br><0.001                      | Overall p-value:<br>0.038      |
| <b>0</b>                       | 1.00                                            | 1.00                           |
| <b>1-6</b>                     | 1.59 (0.51 – 4.92)                              | 3.24 (1.13 – 9.25)             |
| <b>7-12</b>                    | 3.74 (1.70 – 8.23)                              | 0.98 (0.45 – 2.11)             |
| <b>&gt;12</b>                  | 3.73 (1.72 – 8.10)                              | 2.63 (1.24 – 5.60)             |

**Footnotes:** 1. Adjusted for sex, birthweight z-score, gestational age in weeks, maternal smoking in pregnancy, oxygen dependency at 28 days, airleak, patent ductus arteriosus, pulmonary haemorrhage, major neonatal ultrasound abnormality, ventilation group and age at 24 month assessment using multiple logistic regression analysis.

## Further information on propensity score matching

Figure A: distribution of propensity scores by postnatal steroids given ('syster'=yes/no)

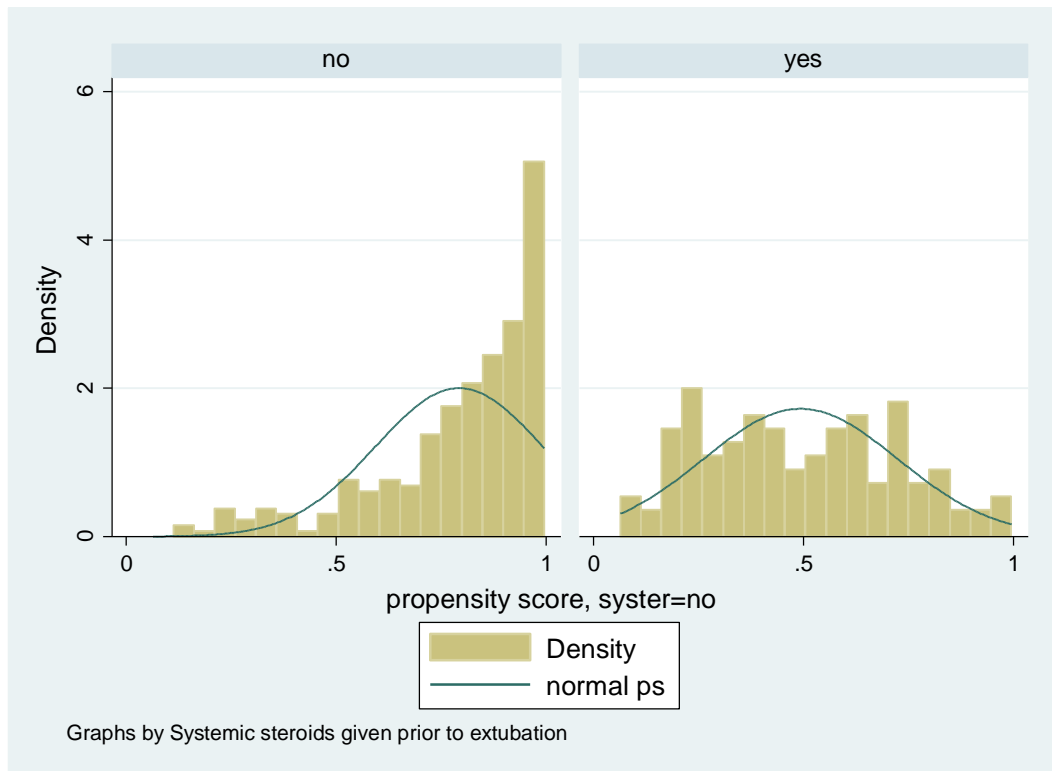

## Matching

Full matching was achieved in the analysis with just two observations not achieving a match within 0.025. A sensitivity analysis of without these two subjects gave a very similar result for each of the two outcomes as shown below

| Model                                                                   | OR   | 95% CI     | P      |
|-------------------------------------------------------------------------|------|------------|--------|
| Respiratory hospital admissions<br>all subjects                         | 1.26 | 1.07, 1.49 | 0.005  |
| Respiratory hospital admissions<br>Without 2 subjects with poorer match | 1.24 | 1.05, 1.47 | 0.010  |
| Neurodevelopmental impairment:<br>all subjects                          | 1.34 | 1.15, 1.58 | <0.001 |
| Neurodevelopmental impairment:<br>without 2 subjects with poorer match  | 1.36 | 1.16, 1.59 | <0.001 |
